# Supplementary material
Source: HighWire-hosted journal article supplement (https://www.highwirestage.com/highwire/filestream/90817/field_highwire_adjunct_files/0/1622.pdf)
Supplement: 1622.pdf [file 1622.pdf]

| Table 1. Response Categories according to Therasse et al vs Abrey et al |                |        |              |        |             |        |              |        |
|-------------------------------------------------------------------------|----------------|--------|--------------|--------|-------------|--------|--------------|--------|
| Method                                                                  | Therasse et al |        |              |        | Abrey et al |        |              |        |
|                                                                         | CR (%)         | PR (%) | SD (%)       | PD (%) | CR (%)      | PR (%) | SD (%)       | PD (%) |
| Axial 1D / RECIST                                                       | 100 ↓          | 30 ↓   | 30 ↓ to 20 ↑ | 20 ↑   | 100 ↓       | 50 ↓   | 50 ↓ to 25 ↑ | 25 ↑   |
| Longest 1D                                                              | 100 ↓          | 30 ↓   | 30 ↓ to 20 ↑ | 20 ↑   | 100 ↓       | 50 ↓   | 50 ↓ to 25 ↑ | 25 ↑   |
| 2D                                                                      | 100 ↓          | 50 ↓   | 50 ↓ to 25 ↑ | 25 ↑   | 100 ↓       | 50 ↓   | 50 ↓ to 25 ↑ | 25 ↑   |
| 3D                                                                      | 100 ↓          | 65 ↓   | 65 ↓ to 40 ↑ | 40 ↑   | 100 ↓       | 65 ↓   | 65 ↓ to 40 ↑ | 40 ↑   |

Abbreviations: RECIST, Axial 1D and Longest 1D based on RECIST 1.1 criteria; 2D based on McDonald modified; 3D based on volume; ↑, increase in size; ↓, decrease in size.<sup>5,12,13,16</sup>

Table 6. Response categories and agreement for each measurement method using 20-30%, 25-50% and 40-65% cut-offs for 1D, 2D and 3D respectively

| Measurement Method | Response counts in absolute (%) |             |             |             | Frequency of Agreement in % |            |        |    |
|--------------------|---------------------------------|-------------|-------------|-------------|-----------------------------|------------|--------|----|
|                    | CR                              | PR          | SD          | PD          | Axial 1D                    | Longest 1D | RECIST | 2D |
| Axial 1D           | 22<br>(55)                      | 7<br>(17.5) | 4<br>(10)   | 7<br>(17.5) | -                           | -          | -      | -  |
| Longest 1D         | 22<br>(55)                      | 6<br>(15)   | 4<br>(10)   | 8<br>(20)   | 95                          | -          | -      | -  |
| RECIST             | 22<br>(55)                      | 8<br>(20)   | 5<br>(12.5) | 5<br>(12.5) | 90                          | 92.5       | -      | -  |
| 2D                 | 22<br>(55)                      | 6<br>(15)   | 3<br>(7.5)  | 9<br>(22.5) | 92.5                        | 97.5       | 90     | -  |
| 3D                 | 22<br>(55)                      | 7<br>(17.5) | 4<br>(10)   | 7<br>(17.5) | 87.5                        | 92.5       | 90     | 95 |

Table 7. Response categories and agreement for each measurement method using 25-50% for 1D and 2D and 40-65% for 3D respectively

| Measurement Method | Response counts in absolute (%) |             |             |             | Frequency of Agreement in % |            |        |    |
|--------------------|---------------------------------|-------------|-------------|-------------|-----------------------------|------------|--------|----|
|                    | CR                              | PR          | SD          | PD          | Axial 1D                    | Longest 1D | RECIST | 2D |
| Axial 1D           | 22<br>(55)                      | 7<br>(17.5) | 5<br>(12.5) | 6<br>(15)   | -                           | -          | -      | -  |
| Longest 1D         | 22<br>(55)                      | 5<br>(12.5) | 5<br>(12.5) | 8<br>(20)   | 92.5                        | -          | -      | -  |
| RECIST             | 22<br>(55)                      | 6<br>(15)   | 7<br>(17.5) | 5<br>(12.5) | 90                          | 90         | -      | -  |
| 2D                 | 22<br>(55)                      | 6<br>(15)   | 3<br>(7.5)  | 9<br>(22.5) | 87.5                        | 95         | 85     | -  |
| 3D                 | 22<br>(55)                      | 7<br>(17.5) | 4<br>(10)   | 7<br>(17.5) | 82.5                        | 90         | 85     | 95 |
